# Supplementary material for: Synthesis, structure, and photoluminesence of the chloridoaluminates [BMIm][Sn(AlCl4)3], [BMPyr][Sn(AlCl4)3], and [BMIm][Pb(AlCl4)3]
Source: Royal Society of Chemistry journal article supplement (doi:10.1039/d0dt03766d), 2021-01-01
Supplement: d0dt03766d1.pdf [file d0dt03766d1.pdf]

# Synthesis, Structure, and Photoluminescence of the Chloridoaluminates [BMIm][Sn(AlCl<sub>4</sub>)<sub>3</sub>], [BMPyr][Sn(AlCl<sub>4</sub>)<sub>3</sub>], and [BMIm][Pb(AlCl<sub>4</sub>)<sub>3</sub>]

**Silke Wolf, Mareike Liebertseder, and Claus Feldmann\***

*Institut für Anorganische Chemie, Karlsruhe Institute of Technology (KIT)*

*Engesserstrasse 15, D-76131 Karlsruhe, Germany*

*claus.feldmann@kit.edu*

## – SUPPORTING INFORMATION –

### Content

- Unit cells of [BMIm][Sn(AlCl<sub>4</sub>)<sub>3</sub>] (**1**), [BMPyr][Sn(AlCl<sub>4</sub>)<sub>3</sub>] (**2**), and [BMIm][Pb(AlCl<sub>4</sub>)<sub>3</sub>] (**3**)
- Asymmetric unit of the title compounds **1**, **2**, and **3**
- Disorder of the [BMIm]<sup>+</sup> cation in **1** and **3**

The unit cells of [BMIm][Sn(AlCl<sub>4</sub>)<sub>3</sub>] (**1**), [BMPyr][Sn(AlCl<sub>4</sub>)<sub>3</sub>] (**2**), and [BMIm][Pb(AlCl<sub>4</sub>)<sub>3</sub>] (**3**) are displayed in Figure S1. The structural similarity of the three title compounds is obvious.

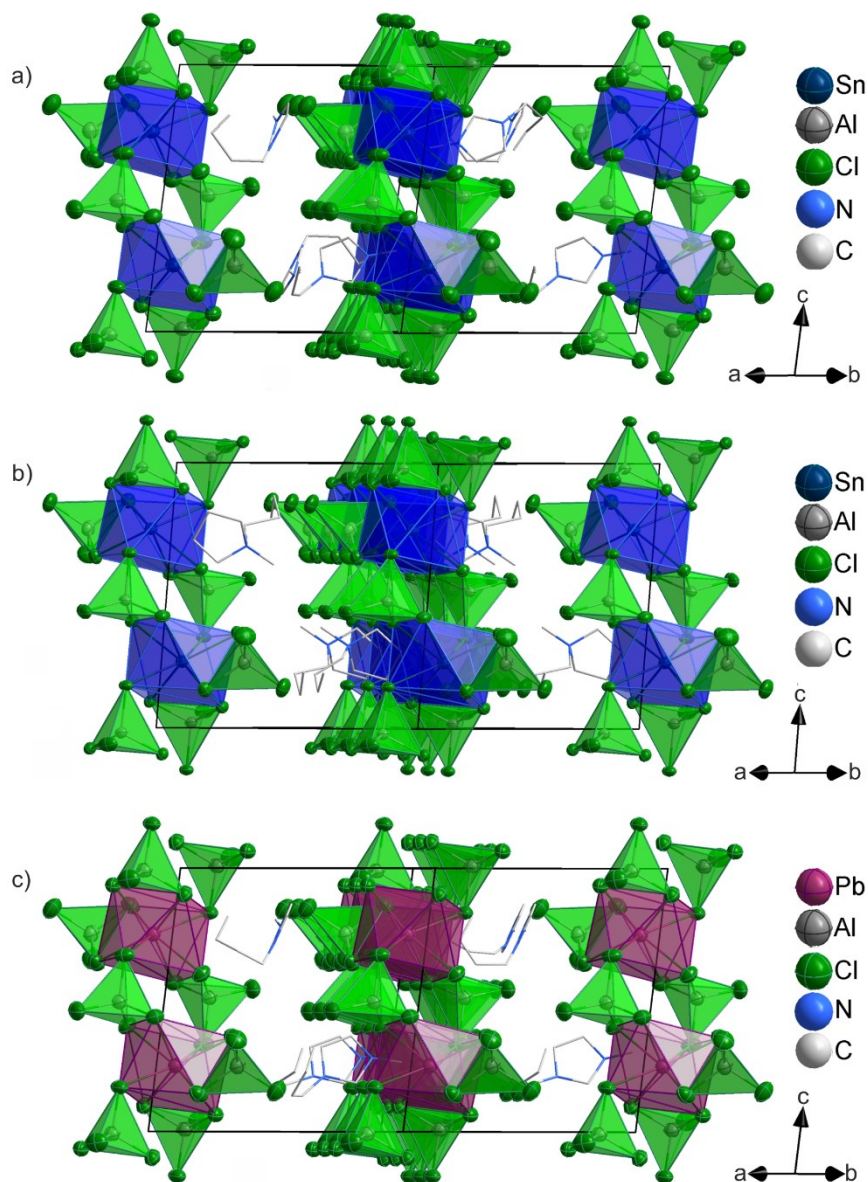

**Figure S1.** Unit cells of (a) [BMIm][Sn(AlCl<sub>4</sub>)<sub>3</sub>] (**1**), (b) [BMPyr][Sn(AlCl<sub>4</sub>)<sub>3</sub>] (**2**), and (c) [BMIm][Pb(AlCl<sub>4</sub>)<sub>3</sub>] (**3**) with coordination polyhedra around Sn<sup>2+</sup> (blue) and Pb<sup>2+</sup> (magenta), [AlCl<sub>4</sub>]<sup>-</sup> tetrahedra in green and cations ([BMIm]<sup>+</sup>, [BMPyr]<sup>+</sup>) in grey (for [BMIm]<sup>+</sup> with only one of two dislocated positions).

The asymmetric unit of the title compounds **1**, **2**, and **3** is shown in Figure S2. Finally, the disorder of the [BMIm]<sup>+</sup> cation in **1** and **3** with two more-or-less rotated (180 °) sites is exemplarily shown (Figure S3). This situation was tackled by split positions for all atoms of the [BMIm]<sup>+</sup> cation with a probability of finding of 50% for each position.

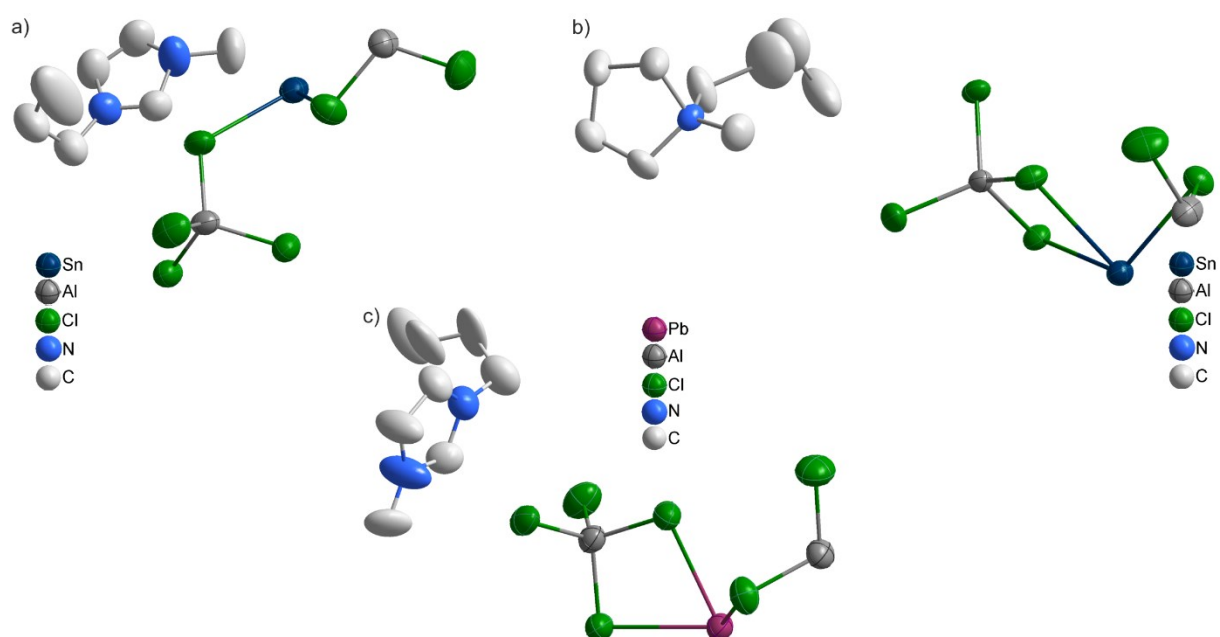

**Figure S2.** Asymmetric unit of (a) [BMIm][Sn(AlCl<sub>4</sub>)<sub>3</sub>] (**1**), (b) [BMPyr][Sn(AlCl<sub>4</sub>)<sub>3</sub>] (**2**), and (c) [BMIm][Pb(AlCl<sub>4</sub>)<sub>3</sub>] (**3**).

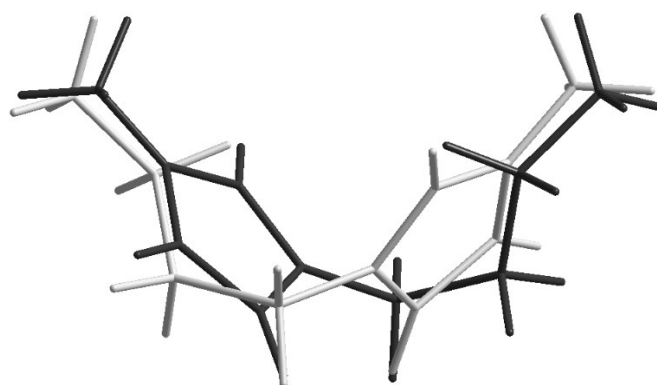

**Figure S3.** Disorder of the [BMIm]<sup>+</sup> cation in **1** and **3** with two more-or-less rotated (180 °) positions.
